# Supplementary material for: A rational design of separator with substantially enhanced thermal features for lithium-ion batteries by the polydopamine–ceramic composite modification of polyolefin membranes
Source: Royal Society of Chemistry journal article supplement (doi:10.1039/c6ee01219a), 2016-01-01
Supplement: c6ee01219a1.pdf [file c6ee01219a1.pdf]

Electronic Supplementary Information:

**A rational design of separator with substantially enhanced thermal  
features for lithium-ion batteries by polydopamine-ceramic  
composite modification of polyolefin membranes**

Jianhui Dai,<sup>a</sup> Chuan Shi,<sup>b</sup> Chao Li,<sup>b</sup> Xiu Shen,<sup>b</sup> Longqing Peng,<sup>b</sup> Dezhi Wu,<sup>c</sup> Daoheng Sun,<sup>c</sup> Peng Zhang<sup>\*a</sup> and Jinbao Zhao<sup>\*ab</sup>

*a. School of Energy Research, College of Energy, Xiamen University, Xiamen, 361005, P. R. China*

*b. State Key Lab of Physical Chemistry of Solid Surfaces, Department of Chemistry, Collaborative Innovation Centre of Chemistry for Energy Materials, College of Chemistry and Chemical Engineering, Xiamen University, Xiamen, 361005, P. R. China.*

*c. School of Aerospace Engineering, Xiamen University, Xiamen 361005, P. R. China*

\*Corresponding author. E-mail: jbzha@xmu.edu.cn (J. Zhao); pengzhang@xmu.edu.cn (P. Zhang)

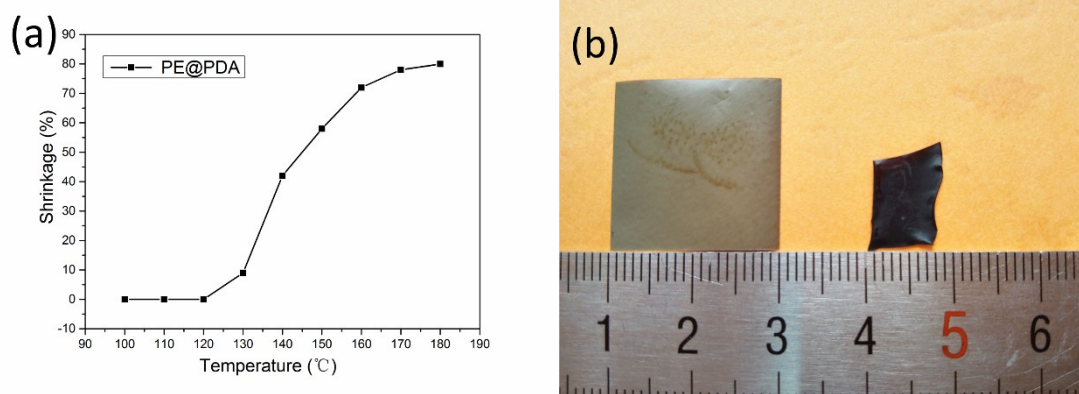

Fig. S1 (a) Thermal shrinkage of the PE@PDA separator as a function of temperature, (b) Dimension of the PE@PDA separator before and after subjected to heat treatment at 170 °C for 30 min

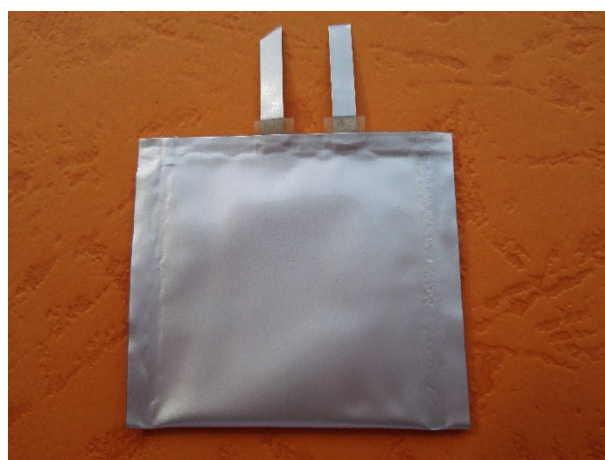

Fig. S2 Photograph of the pouch cell for OCV test

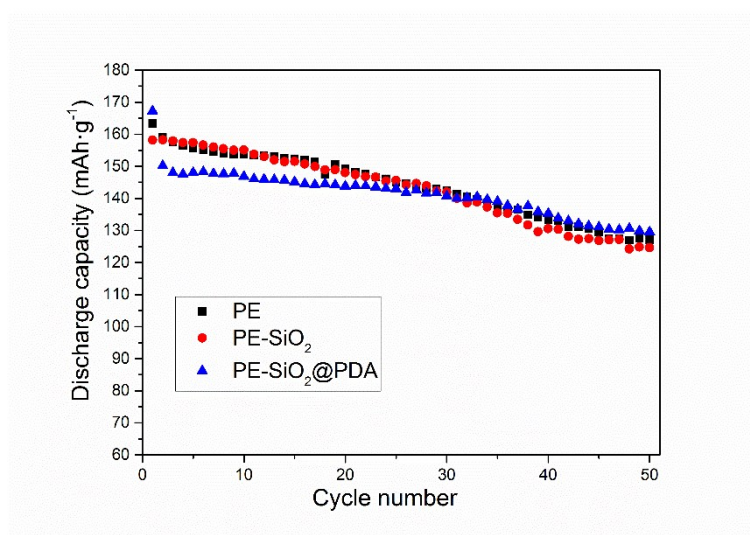

Fig. S3 Cycle performance of the cells at 60 °C
